# Supplementary material for: Design of nickel cobalt molybdate regulated by boronizing for high-performance supercapacitor applications
Source: Royal Society of Chemistry journal article supplement (doi:10.1039/d0nr05377e), 2020-01-01
Supplement: d0nr05377e1.pdf [file d0nr05377e1.pdf]

## **Design of nickel cobalt molybdate regulated by boronizing for high-performance supercapacitor applications**

Gang Zhao<sup>1</sup>, Yumeng Chen<sup>1</sup>, Pengxiao Sun<sup>1</sup>, Shuhua Hao, Xiaoke Wang, Guangmeng Qu, Yupeng Xing, Xijin Xu\*

Laboratory of Functional Micro-nano Material and Device, School of Physics and Technology, University of Jinan, Jinan 250022, P. R. China

\* Corresponding address: sps\_xuxj@ujn.edu.cn or phys\_xu@hotmail.com

<sup>1</sup>These authors contributed equally to the work

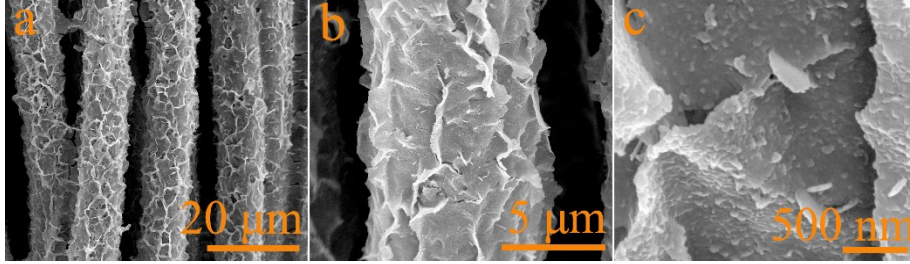

**Figure S1.** (a-c) SEM images of  $\text{Ni}_3\text{B}/\text{Ni}(\text{BO}_2)_2@ \text{Ni}_x\text{Co}_y\text{MoO}_4$  nanostructures with sodium borohydride treatment for 1 h.

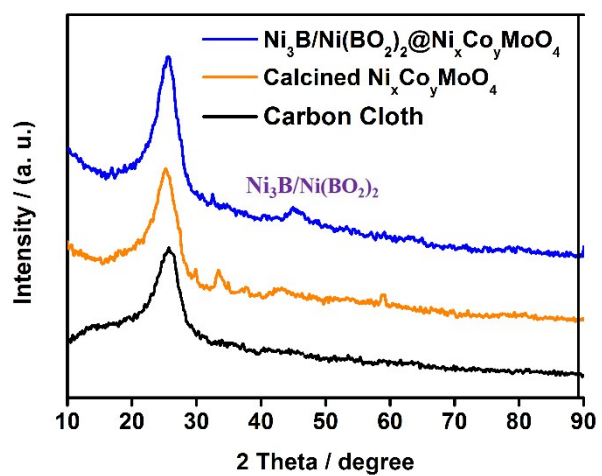

**Figure S2.** XRD patterns of carbon cloth, calcined  $\text{Ni}_x\text{Co}_y\text{MoO}_4$  and  $\text{Ni}_3\text{B}/\text{Ni}(\text{BO}_2)_2@ \text{Ni}_x\text{Co}_y\text{MoO}_4$  on carbon cloth substrate.

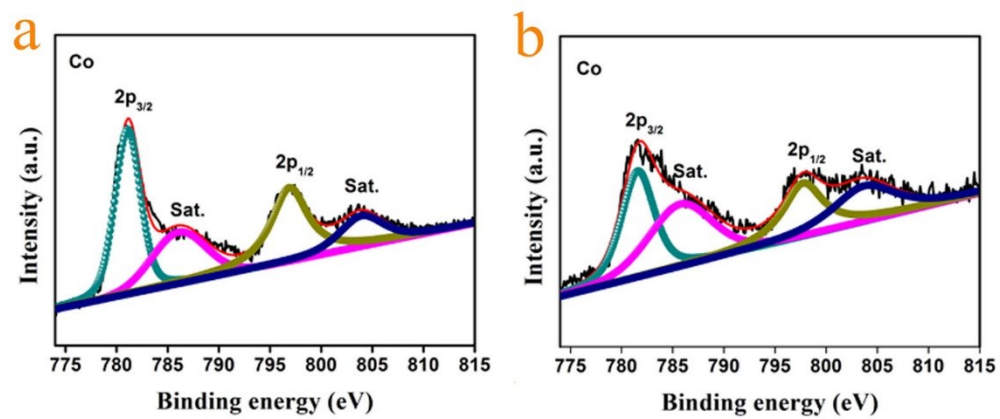

**Figure S3.** XPS spectra of Ni<sub>x</sub>Co<sub>y</sub>MoO<sub>4</sub> (a) and Ni<sub>3</sub>B/Ni(BO<sub>2</sub>)<sub>2</sub>@Ni<sub>x</sub>Co<sub>y</sub>MoO<sub>4</sub> (b) in Co 2p spectra.

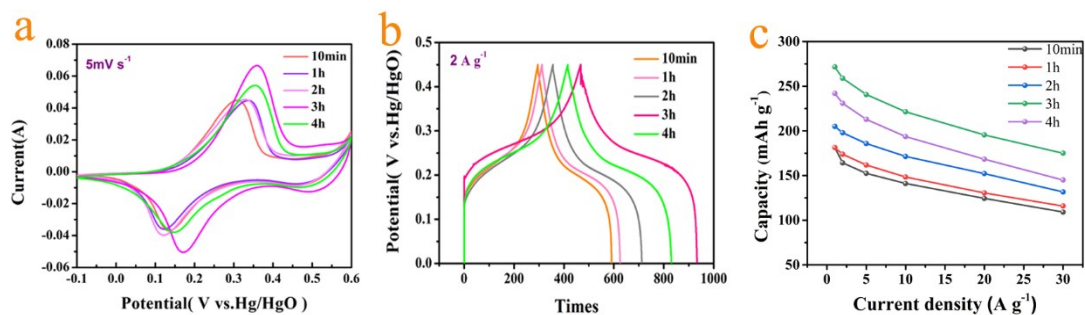

**Figure S4.** (a) CV curves of different samples in different sodium borohydride treatment times at  $5 \text{ mV s}^{-1}$ , (b) GCD curves of  $\text{Ni}_3\text{B}/\text{Ni}(\text{BO}_2)_2@ \text{Ni}_x\text{Co}_y\text{MoO}_4$  at  $2 \text{ A g}^{-1}$ , (c) capacity of  $\text{Ni}_3\text{B}/\text{Ni}(\text{BO}_2)_2@ \text{Ni}_x\text{Co}_y\text{MoO}_4$  at different current densities.
